# Supplementary material for: Is happier music groovier? The influence of emotional characteristics of musical chord progressions on groove
Source: Springer Nature journal article supplement (doi:10.1007/s00426-023-01869-x), 2023-08-24
Supplement: MOESM2 [file 25961972]

**Table S1.** Mean ratings of each item in Experiment 1.

|             | C1           | C2           | C3           | C4           | RC1          | RC2          | RC3          | RC4          | R            |
|-------------|--------------|--------------|--------------|--------------|--------------|--------------|--------------|--------------|--------------|
| Groove      | 3.0<br>(1.7) | 2.7<br>(1.9) | 2.3<br>(1.7) | 2.2<br>(1.5) | 5.1<br>(1.7) | 4.7<br>(1.8) | 4.6<br>(2)   | 4.4<br>(1.7) | 5.3<br>(1.5) |
| Nori        | 2.9<br>(1.6) | 2.6<br>(1.8) | 2.3<br>(1.7) | 2.2<br>(1.6) | 5.2<br>(1.6) | 4.8<br>(1.6) | 4.9<br>(1.7) | 4.6<br>(1.6) | 5.2<br>(1.7) |
| Pleasurable | 5.1<br>(1.6) | 4.3<br>(1.8) | 3.6<br>(1.6) | 3.7<br>(1.7) | 5.4<br>(1.6) | 4.8<br>(1.6) | 4.3<br>(1.6) | 4.1<br>(1.8) | 4.5<br>(1.7) |
| Resonating  | 4.5<br>(1.6) | 3.6<br>(1.7) | 3.4<br>(1.6) | 3.4<br>(1.7) | 4.9<br>(1.6) | 4.5<br>(1.6) | 4.1<br>(1.7) | 4.2<br>(1.6) | 4.1<br>(1.8) |
| Happy       | 4.4<br>(1.7) | 3.4<br>(1.9) | 2.4<br>(1.6) | 2.4<br>(1.6) | 5.4<br>(1.6) | 4.7<br>(1.7) | 4.3<br>(1.8) | 3.6<br>(1.9) | 4.6<br>(1.7) |
| Sad         | 2.1<br>(1.6) | 2.7<br>(1.6) | 4.6<br>(1.9) | 4.6<br>(1.8) | 1.6<br>(1.3) | 2.3<br>(1.8) | 3.0<br>(1.8) | 3.3<br>(1.9) | 1.5<br>(0.9) |
| Tender      | 4.7<br>(1.9) | 4.1<br>(1.9) | 3<br>(1.6)   | 3.1<br>(1.5) | 4.6<br>(1.8) | 4.2<br>(1.7) | 3.4<br>(1.7) | 3.4<br>(1.5) | 2.8<br>(1.8) |
| Fear        | 1.7<br>(1.2) | 1.8<br>(1.3) | 3.1<br>(2)   | 3.0<br>(2)   | 1.4<br>(1.1) | 1.7<br>(1.3) | 2<br>(1.4)   | 2.3<br>(1.7) | 1.5<br>(0.9) |
| Liking      | 4.6<br>(1.6) | 4.1<br>(1.7) | 3.3<br>(1.8) | 3.7<br>(1.8) | 5.1<br>(1.7) | 4.7<br>(1.5) | 4.1<br>(1.7) | 4.1<br>(1.9) | 3.6<br>(1.5) |

Values in parentheses represent standard deviations.

**Table S2.** Mean ratings of each item in Experiment 2.

| Emotion      | Happy        |              |              |              | Sad          |              |              |              | Drums only   |              |              |              |
|--------------|--------------|--------------|--------------|--------------|--------------|--------------|--------------|--------------|--------------|--------------|--------------|--------------|
|              | Slow         |              | Mid          |              | Slow         |              | Mid          |              | Slow         |              | Mid          |              |
|              | Low          | Mid          | Low          | Mid          | Low          | Mid          | Low          | Mid          | Low          | Mid          | Low          | Mid          |
| Synchopation |              |              |              |              |              |              |              |              |              |              |              |              |
| Groove       | 3.1<br>(1.5) | 3.5<br>(1.5) | 5.3<br>(1.2) | 5.4<br>(1.3) | 2.7<br>(1.5) | 2.7<br>(1.4) | 4.3<br>(1.4) | 4.6<br>(1.6) | 3.5<br>(1.8) | 3.9<br>(1.8) | 5.3<br>(1.2) | 5.4<br>(1.4) |
| Nori         | 3.2<br>(1.5) | 3.6<br>(1.4) | 5.5<br>(1.1) | 5.5<br>(1.3) | 2.7<br>(1.5) | 2.7<br>(1.4) | 4.7<br>(1.3) | 4.8<br>(1.4) | 3.1<br>(1.6) | 3.8<br>(1.7) | 5.4<br>(1.3) | 5.5<br>(1.3) |
| Pleasurable  | 5.0<br>(1.5) | 5.1<br>(1.4) | 5.3<br>(1.3) | 5.1<br>(1.4) | 3.7<br>(1.6) | 3.6<br>(1.6) | 4.0<br>(1.5) | 4.1<br>(1.6) | 3.4<br>(1.6) | 3.7<br>(1.7) | 4.3<br>(1.4) | 4.1<br>(1.7) |
| Resonating   | 3.7<br>(1.4) | 3.9<br>(1.5) | 4.6<br>(1.4) | 4.6<br>(1.4) | 3.1<br>(1.4) | 3.2<br>(1.4) | 3.9<br>(1.6) | 4.3<br>(1.6) | 3.2<br>(1.5) | 3.4<br>(1.7) | 4.1<br>(1.6) | 4.2<br>(1.7) |
| Happy        | 3.8<br>(1.5) | 4.1<br>(1.5) | 5.4<br>(1.2) | 5.5<br>(1.3) | 2.2<br>(1.3) | 2.1<br>(1.1) | 3.1<br>(1.8) | 3.3<br>(1.7) | 2.7<br>(1.6) | 3.3<br>(1.7) | 4.4<br>(1.6) | 4.7<br>(1.6) |
| Sad          | 2.5<br>(1.6) | 2.1<br>(1.4) | 1.5<br>(0.9) | 1.6<br>(0.9) | 4.6<br>(1.8) | 4.8<br>(1.7) | 3.9<br>(1.8) | 3.8<br>(1.7) | 1.8<br>(1.1) | 1.7<br>(1)   | 1.6<br>(1)   | 1.4<br>(0.9) |

|        |              |              |              |              |              |              |              |              |              |              |              |              |
|--------|--------------|--------------|--------------|--------------|--------------|--------------|--------------|--------------|--------------|--------------|--------------|--------------|
| Tender | 5.0<br>(1.6) | 4.8<br>(1.6) | 4.5<br>(1.5) | 4.4<br>(1.6) | 3.0<br>(1.5) | 2.9<br>(1.5) | 3.0<br>(1.5) | 3.0<br>(1.6) | 2.5<br>(1.5) | 2.4<br>(1.5) | 2.3<br>(1.3) | 2.3<br>(1.4) |
| Fear   | 1.5<br>(1.0) | 1.5<br>(1.1) | 1.3<br>(0.7) | 1.4<br>(0.8) | 3.1<br>(1.7) | 3.3<br>(1.8) | 2.5<br>(1.6) | 2.6<br>(1.7) | 1.6<br>(1)   | 1.6<br>(1.1) | 1.4<br>(0.9) | 1.4<br>(1)   |
| Liking | 4.3<br>(1.6) | 4.3<br>(1.5) | 5.0<br>(1.4) | 5.0<br>(1.3) | 3.7<br>(1.6) | 3.3<br>(1.7) | 3.8<br>(1.6) | 4.4<br>(1.7) | 2.9<br>(1.5) | 2.9<br>(1.7) | 3.7<br>(1.5) | 3.9<br>(1.6) |

---

Values in parentheses represent standard deviations.
